# Supplementary material
Source: Royal Society of Chemistry journal article supplement (doi:10.1039/d5lc00941c)
Supplement: d5lc00941c4.pdf [file d5lc00941c4.pdf]

# Lab on a Chip

## Supplementary Information

**Title:** Sequential Intracellular Delivery of Genetic Coding Molecules Using an Acoustic Electric Microfluidic Platform

**Authors:** Michelle Zhang, Aida Z. Taravatfard, Mohammad Aghaamoo, and Abraham

**Table S1** Components of a MIFlowCyt-compliant experiment description.

|                               |                                                                                                                                                                                                                                      |
|-------------------------------|--------------------------------------------------------------------------------------------------------------------------------------------------------------------------------------------------------------------------------------|
| <b>Experiment Overview</b>    | <b>Purpose/Goal/Hypothesis</b><br>Quantify number of transfected HeLa cells by plasmid and Cas9 RNP                                                                                                                                  |
|                               | <b>Experiment Variables</b><br>HeLa cells were transfected with GFP-expressing plasmid DNA (0.5 µg, 1 µg, and 1.5 µg) and Cas9 RNP (1:1, 1:3) on D0. Plasmid transfection efficiency analyzed on Day 2 and Cas9 KO analyzed on Day 7 |
|                               | <b>Conclusions</b><br>HeLa cells were successfully transfected in all conditions                                                                                                                                                     |
|                               | <b>Quality Control</b><br>Untransfected cells were used to provide negative plasmid control and unstained cells were used to provide negative staining control                                                                       |
| <b>Flow Sample (Specimen)</b> | <b>Material</b><br>Cancer cell line                                                                                                                                                                                                  |
|                               | <b>Source/Organism/Location</b><br>HeLa cells                                                                                                                                                                                        |
|                               | <b>Treatment</b><br>Plasmid: cells were washed with PBS<br>Cas9 RNP: cells were stained with a PE-conjugated CD47 antibody                                                                                                           |
|                               | <b>Reagent/Analyte/Detector/Reporter</b><br>Plasmid: GFP<br>Cas9 RNP: PE                                                                                                                                                             |
| <b>Data Analysis</b>          | <b>List-Mode Data</b><br>FCS data files can be obtained by contacting Michelle Zhang after this work has been published                                                                                                              |
|                               | <b>Compensation</b><br>N/A, only single channel                                                                                                                                                                                      |
|                               | <b>Gating</b><br>Same gating strategy has been used for all data files                                                                                                                                                               |
|                               | <b>Descriptive Statistics</b><br>% fluorescence                                                                                                                                                                                      |
| <b>Instrument Details</b>     | <b>Instrument Identification</b><br>NovoCyt 3000                                                                                                                                                                                     |
|                               | <b>Fluidics Configuration</b><br>Instrument has not been altered                                                                                                                                                                     |
|                               | <b>Optical Configuration</b><br>Instrument has not been altered                                                                                                                                                                      |
|                               | <b>Electronic Configuration</b><br>Instrument has not been altered                                                                                                                                                                   |

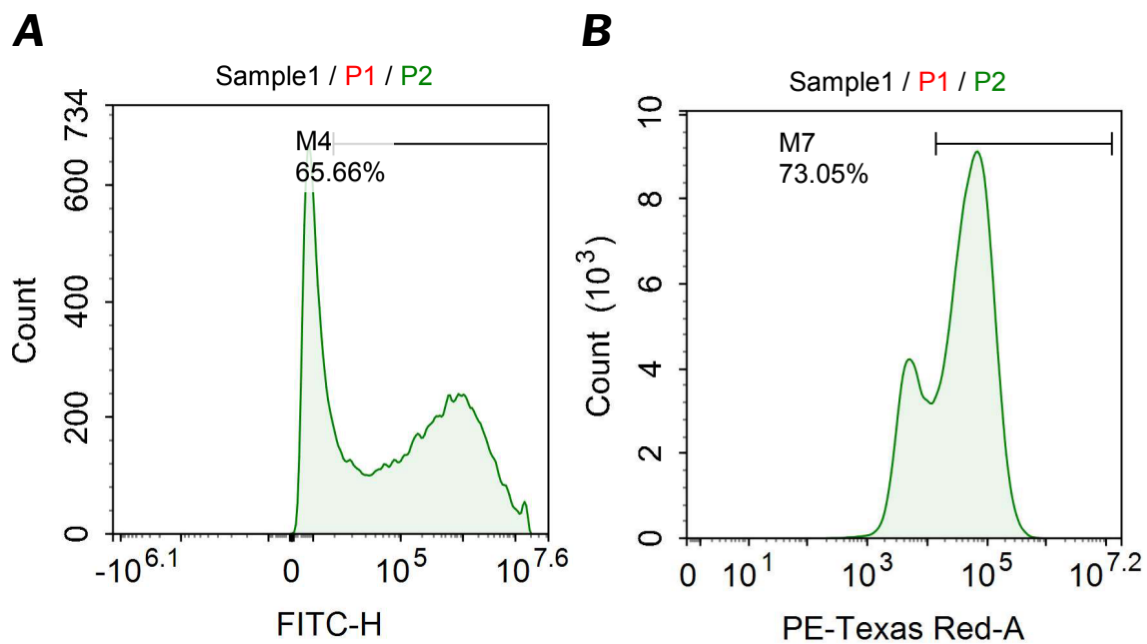

**Figure S1** Flow cytometry gating strategy; A) Transfection efficiency of ~3.5kbp GFP-expressing plasmid DNA, B) Percentage of cells in the population that did not express fluorescence upon CD47 antibody staining.

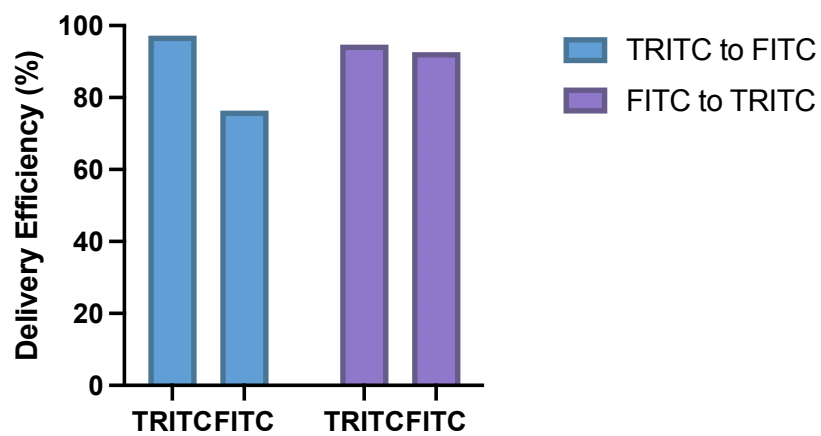

**Figure S2** Sequential delivery efficiency based on the order of delivery of 150 kDa TRITC and 500 kDa FITC dextran molecules.

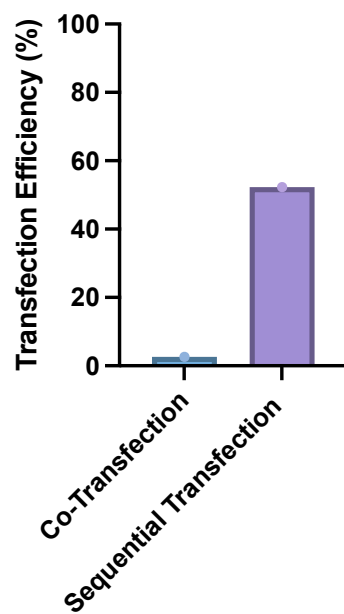

**Figure S3** Plasmid transfection efficiency with co-transfection strategy compared to sequential transfection of plasmid DNA and Cas9 RNP using the AESOP platform.
